## Student Mental Health

A Guide for Psychiatrists,  
Psychologists, and Leaders  
Serving in Higher Education

Edited by Laura Weiss Roberts, M.D., M.A.

### Student Mental Health

is both down-to-earth and aspirational, providing evidence and best practices to ensure greater mental health on campus, while stimulating conversation about how to ensure and optimize the value of higher education through thoughtful, sophisticated approaches to student mental health.

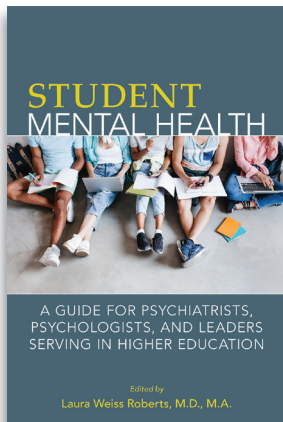

The chapter authors address life transitions and the university student experience, as well as the challenges of caring for university students with mental health issues.

The book has positive strategies, including ways to foster mental health for distinct university student populations.

2018 • 530 pages • ISBN 978-1-61537-114-3 • Paperback • \$62.00 • Item #37114

2018 • 530 pages • ISBN 978-1-61537-194-5 • eBook • \$49.95 • Item #37194

AMERICAN  
PSYCHIATRIC  
ASSOCIATION  
PUBLISHING

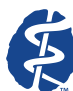

www.appi.org  
Toll Free: 1-800-368-5777  
Email: appi@psych.org

20% Discount • American Psychiatric Association Members  
25% Discount • APA Resident-Fellow Members

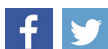

AH1846

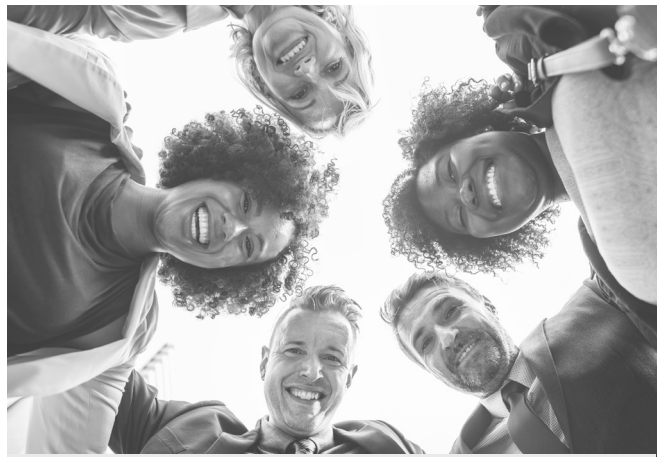

### EXPAND YOUR OPPORTUNITIES AND GROW YOUR CAREER

HOPE • RECOVERY • WELLBEING

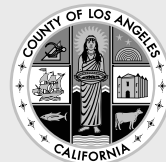

Join the largest, most dynamic mental health department in the nation and make a difference in the lives of those who need it the most.

- Multiple avenues for advancement and professional development
- Flexible work schedules, unparalleled work-life balance
- Highly competitive benefits
- Competitive starting annual salary with potential bonuses of up to **\$32,000 annually**
- Student loan repayment incentive of up to **\$250,000**
- Reimbursement for eligible relocation expense of up to **\$15,000**

[www.psychiatristjobs.la](http://www.psychiatristjobs.la)

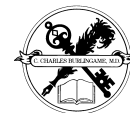

We are pleased to announce that  
**MAX FINK, M.D.**  
is the 2019 recipient of the  
**C. CHARLES BURLINGAME, M.D. AWARD**  
for his outstanding contributions to psychiatry.

#### Past Recipients

1988 Robert Kellner, M.D., Ph.D.  
1989 William T. Carpenter, Jr., M.D.  
1990 Dennis P. Cantwell, M.D.  
1991 George E. Vaillant, M.D.  
1992 A. John Rush, M.D.  
1993 John C. Nemiah, M.D.  
1994 Maurice J. Martin, M.D.  
1995 Otto F. Kernberg, M.D.  
1996 Charles P. O'Brien, M.D., Ph.D.  
1997 Glen Owen Gabbard, M.D.  
1998 Lissy F. Jarvik, M.D., Ph.D.  
1999 Nancy C. Andreasen, M.D., Ph.D.  
2000 Lewis L. Judd, M.D.  
2001 Paul S. Appelbaum, M.D.  
2002 Charles B. Nemeroff, M.D., Ph.D.  
2003 Dilip V. Jeste, M.D.  
2004 David H. Barlow, Ph.D.  
2005 Herbert D. Kleber, M.D.  
2006 Daniel N. Stern, M.D.  
2007 Jerrold F. Rosenbaum, M.D.  
2008 K. Ranga Rama Krishnan, M.D.  
2009 David J. Kupfer, M.D.  
2010 Professor Sir Michael Rutter  
2011 Jeffrey A. Lieberman, M.D.  
2012 Judith L. Rapoport, M.D.  
2013 Nora D. Volkow, M.D.  
2014 Daniel R. Weinberger, M.D.  
2015 David A. Brent, M.D.  
2016 Steven S. Sharpstein, M.D.  
2017 Harold Alan Pincus, M.D.  
2018 Kenneth S. Kendler, M.D.

Institute  
of Living

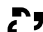

A Division of Hartford Hospital  
200 Retreat Avenue  
Burlingame Building  
Hartford, CT 06106  
860-545-7560

# First Issue Online Now! “The Opioid Crisis: Filling in the Picture”

*Psychiatric Research and Clinical Practice:*  
An Open-Access Journal From the  
American Psychiatric Association

The first issue of *Psychiatric Research and Clinical Practice* (PRCP) focuses on the opioid crisis, covering pharmacological and behavioral treatments of opioid use disorder, general medical and psychiatric comorbidities, and less frequently addressed topics—such as opioid use in Latin America and treatment engagement of pregnant women with opioid use disorder.

PRCP is a peer-reviewed, open-access journal from the American Psychiatric Association that offers a high-profile publishing destination for peer-reviewed submissions that build on the psychiatric knowledge base and bring research findings closer to clinical utility through deeper investigation.

Be a part of the conversation. Submissions are welcome on all aspects of mental and behavioral health to inform the field from bench to bedside. PRCP articles occupy that place between research and clinical utility, leaning toward clinical utility through publication of replication studies and features that show how new scientific knowledge can inform clinical practice.

*Psychiatric Research and Clinical Practice* is committed to keeping the field of psychiatry vibrant and relevant by publishing wide-ranging information on all aspects of mental and behavioral health. Published in accordance with open-access principles, PRCP makes all of its content immediately available for free—the reach one wants from an established and respected publisher.

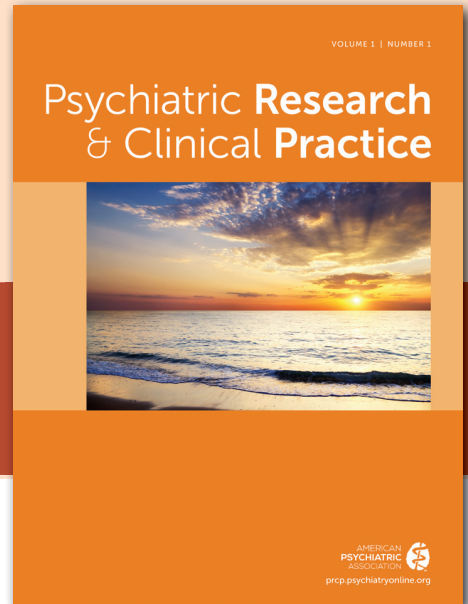

## About the Editor

**Kimberly A. Yonkers, M.D.**, is Professor of Psychiatry, Epidemiology, Obstetrics/Gynecology, and Reproductive Sciences and Director of the Center for Wellbeing of Women and Mothers at Yale University. She brings to the task of serving as PRCP's Editor a broad and deep experience in research and clinical work. Her research includes investigations into the clinical course, etiopathology, and treatment of psychiatric disorders as they occur in women. A major component of this work includes investigations into the occurrence and treatment of illnesses in pregnancy and the postpartum period and across the menstrual cycle. This area, by its nature, cuts across disciplines and requires psychiatric expertise as well as knowledge in neuroscience and reproductive biology. Her work has also included determining optimal methods for screening and treating women for substance use problems when they are pregnant or postpartum.

AMERICAN  
PSYCHIATRIC  
ASSOCIATION  
PUBLISHING

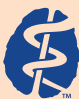

www.appi.org  
1-800-368-5777  
appi@psych.org

[prcp.psychiatryonline.org](http://prcp.psychiatryonline.org)

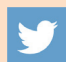

@APAPubPRCP

AH1915
