# Psychiatric Services

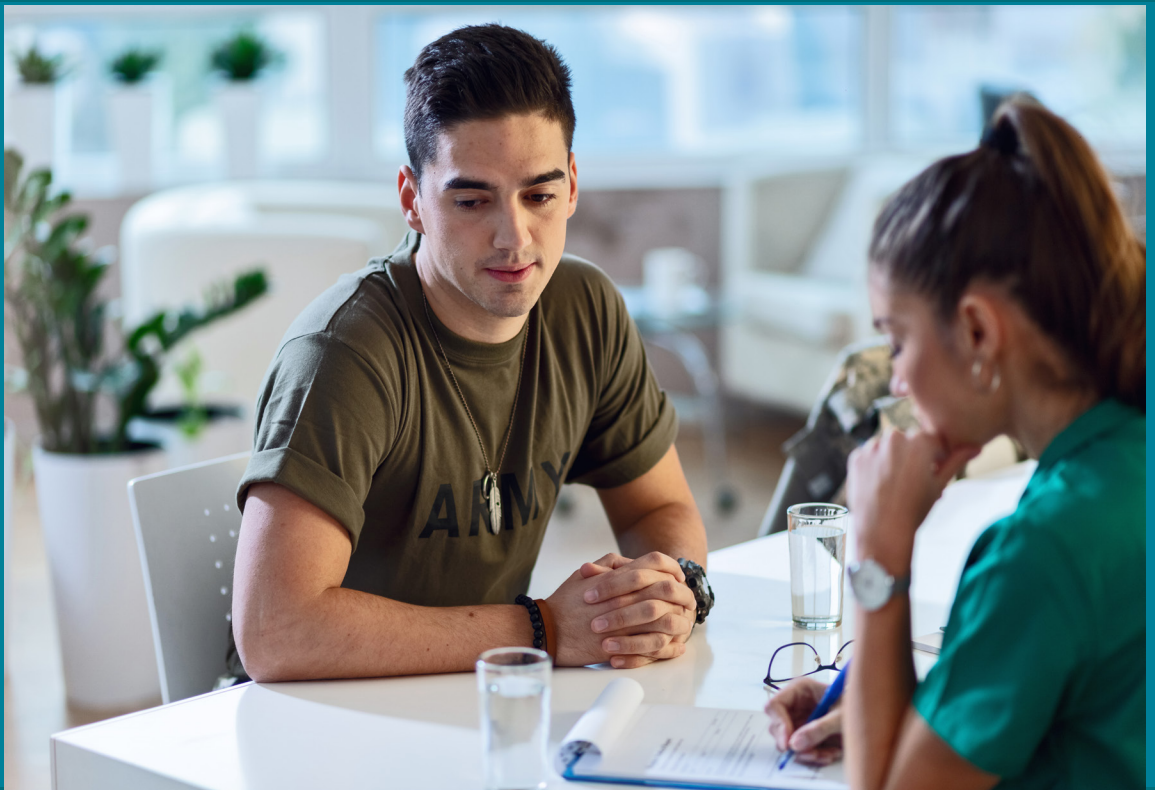

Recent veterans finding treatment sooner

Age as predictor of veterans' use of psychotherapy for PTSD

Using text messaging for postpartum depression screening

Involving family members in shared decision making

AMERICAN  
**PSYCHIATRIC**  
ASSOCIATION

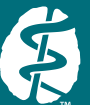

[ps.psychiatryonline.org](http://ps.psychiatryonline.org)
